# Supplementary material for: Pyrite transformation and sulfur dioxide release during calcination of coal gangue
Source: Royal Society of Chemistry journal article supplement (doi:10.1039/c4ra06954d), 2014-01-01
Supplement: c4ra06954d1.pdf [file c4ra06954d1.pdf]

# Supporting Information

## Pyrite Transformation and Sulfur Dioxide Release during Calcination of Coal Gangue

*Yingyi Zhang<sup>1</sup>, Xinlei Ge<sup>2</sup>, Jinichiro Nakano<sup>3</sup>, Lili Liu<sup>1</sup>, Xidong Wang<sup>1</sup>, Zuotai*

*Zhang<sup>1</sup>\**

<sup>1</sup> Beijing Key Laboratory for Solid Waste Utilization and Management and Department of Energy and Resource Engineering, College of Engineering, Peking University, Beijing, 100871, P.R. China

<sup>2</sup> School of Environmental Science and Engineering, Nanjing University of Information Science & Technology, Nanjing 210044, PR China

<sup>3</sup> URS Corp., PO BOX 1959, Albany, OR 97321, USA

\*Corresponding author.

Tel.: +86 10 6275 6623; E-mail address: zuotaizhang@pku.edu.cn (Z.T. Zhang).

### List of contents

**Fig. SI1.** XRD patterns of sediment on tube wall.

**Fig. SI2.** Linear fitting for calculation of E with models  $M_1$  and  $M_2$ .

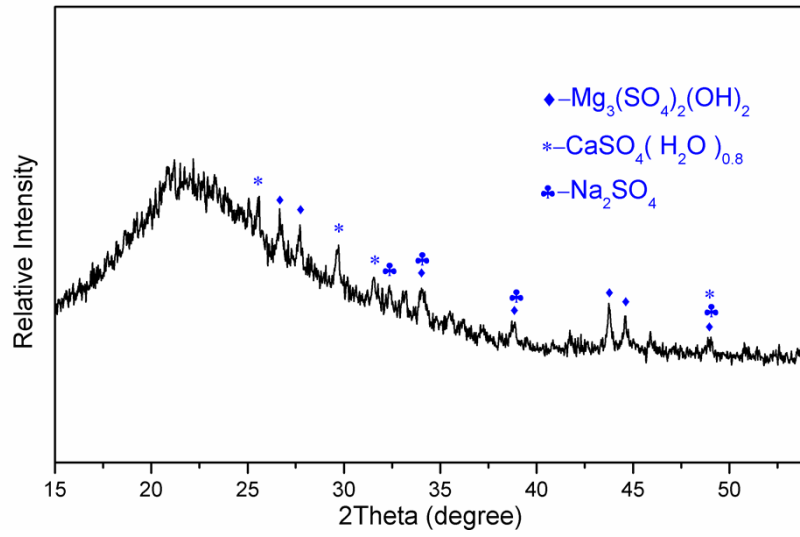

**Fig. S11.** XRD patterns of sediment on tube wall.

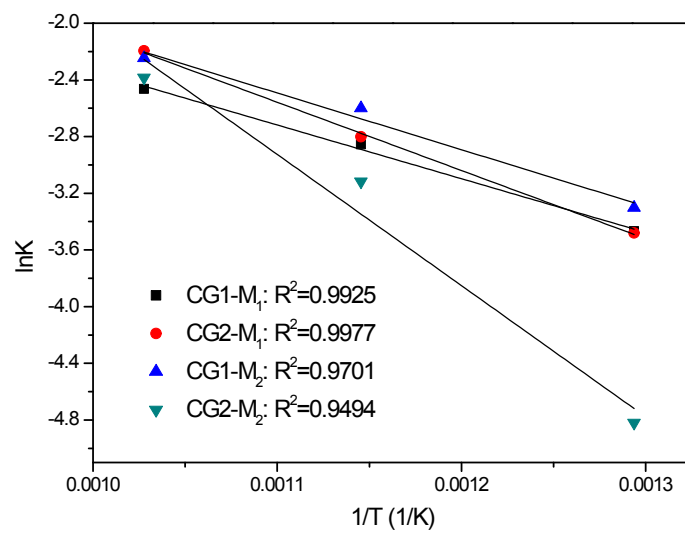

**Fig. SI2.** Linear fitting for calculation of E with models M<sub>1</sub> and M<sub>2</sub>.
